# Supplementary material
Source: Springer Nature journal article supplement (https://www.springermedizin.de/resource/supplementary/12936_2013_3036_MOESM6_ESM.pdf/9544902)

# Mean parasitaemia: 11.5%: Standard deviation: 3.4%

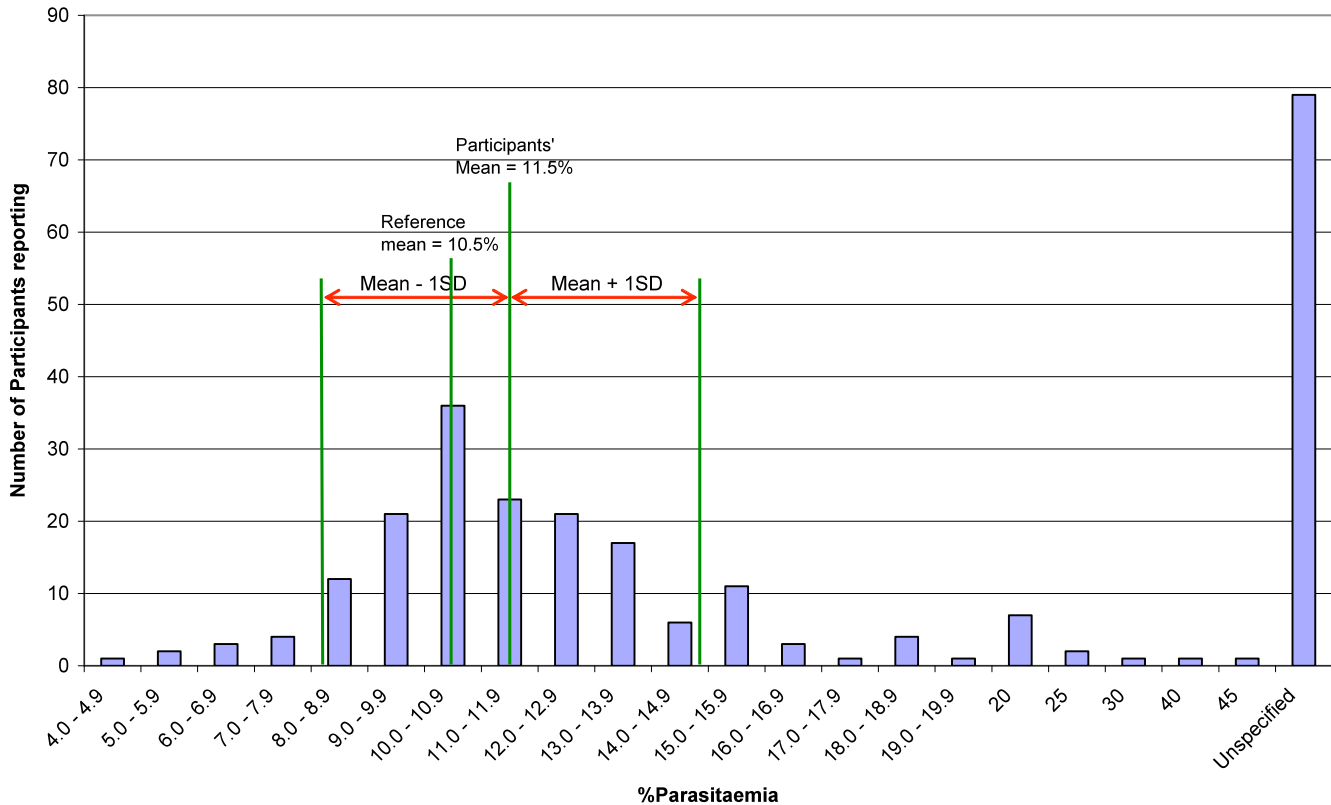

Supplement: MOESM6 [file 9544902]
